# Supplementary material for: Phosphodiesterase-1 Inhibitory Activity of Two Flavonoids Isolated from Pistacia integerrima J. L. Stewart Galls
Source: Evid Based Complement Alternat Med. 2015 Apr 5;2015:506564. doi: 10.1155/2015/506564 (PMC4402172; doi:10.1155/2015/506564)
Supplement: Supplementary file 1 — Supplementary Figure 1 and 2: “The structures of compounds 1-2 were elucidated by spectroscopic analyses including 1D and 2D NMR experiments”. The structures of compounds 3, 4, and 5 were established by comparing their spectral data and physical constants with data already present in literature (Supplementary Figure 3). Supplementary Figure 1. 13C -1H-NMR data (600 MHz, in CDCl3) (A), HMBC (B) and H-H correlations (C) of compound (1). Supplementary Figure 2. 13C -1H-NMR data (600 MHz, in CDCl3) (A), HMBC (B) and H-H correlations (C) of compound (2). Supplementary Figure 3. Structure of Pistagremic acid (3), β-Sitosterol (4) and Stigmasterol (5). [file 506564.f1.zip]

Archive with 4 entries (3 files):
- 506564.f1/
- 506564.f1/Supplementary_Figure_1_ECAM_1310306.ppt
- 506564.f1/Supplementary_Figure_2_ECAM_1310307.ppt
- 506564.f1/Supplementary_Figure_3_ECAM_1310308.ppt
